# Supplementary material for: Synthesis, characterization and structural transformation of a discrete tetragonal metalloprism
Source: Royal Society of Chemistry journal article supplement (doi:10.1039/c1dt10949a), 2011-11-18
Supplement: c1dt10949a.pdf [file c1dt10949a.pdf]

Supporting Information for

## Synthesis, characterization and structural transformation of a discrete tetragonal metalloprism

Jing-Yun Wu,<sup>\*a</sup> Ming-Shiou Zhong,<sup>a</sup> Ming-Hsi Chiang,<sup>b</sup> Meng-Rong Tsai<sup>a</sup> and Long-Li Lai<sup>a</sup>

<sup>a</sup>Department of Applied Chemistry, National Chi Nan University, Nantou 545, Taiwan. E-mail:

jyunwu@ncnu.edu.tw

<sup>b</sup>Institute of Chemistry, Academia Sinica, Taipei 115, Taiwan.

### Contents:

- Fig. S1** <sup>1</sup>H (upper) and <sup>13</sup>C{<sup>1</sup>H} NMR (lower) spectra of dpma in DMSO-*d*<sub>6</sub> at room temperature.
- Fig. S2** Fast atom bombardment (FAB) mass spectrum of dpma. Inset figure shows the result of high resolution FAB mass data of dpma.
- Fig. S3** Negative (upper) and positive (lower) electrospray ionization mass spectra (ESI-MS) of M<sub>2</sub>L<sub>4</sub> metalloprism [(NO<sub>3</sub>)<sup>-</sup>]<sub>2</sub>{Cu<sub>2</sub>(μ-Hdpma)<sub>4</sub>}(NO<sub>3</sub>)<sub>2</sub>](NO<sub>3</sub>)<sub>5</sub> (**1**).
- Fig. S4** Space-filling model representation of the two-dimensional sheet structure of **2**, showing the presence of grooves.
- Fig. S5** Powder X-ray diffraction (PXRD) patterns of **1**. (a) A freshly ground sample at room temperature. (b) Simulated from the single-crystal data.
- Fig. S6** Powder X-ray diffraction (PXRD) patterns of **2**. (a) A freshly ground sample at room temperature. (b) Simulated from the single-crystal data.
- Fig. S7** Powder X-ray diffraction (PXRD) patterns of **3**. (a) A freshly ground sample at room temperature. (b) Simulated from the single-crystal data.

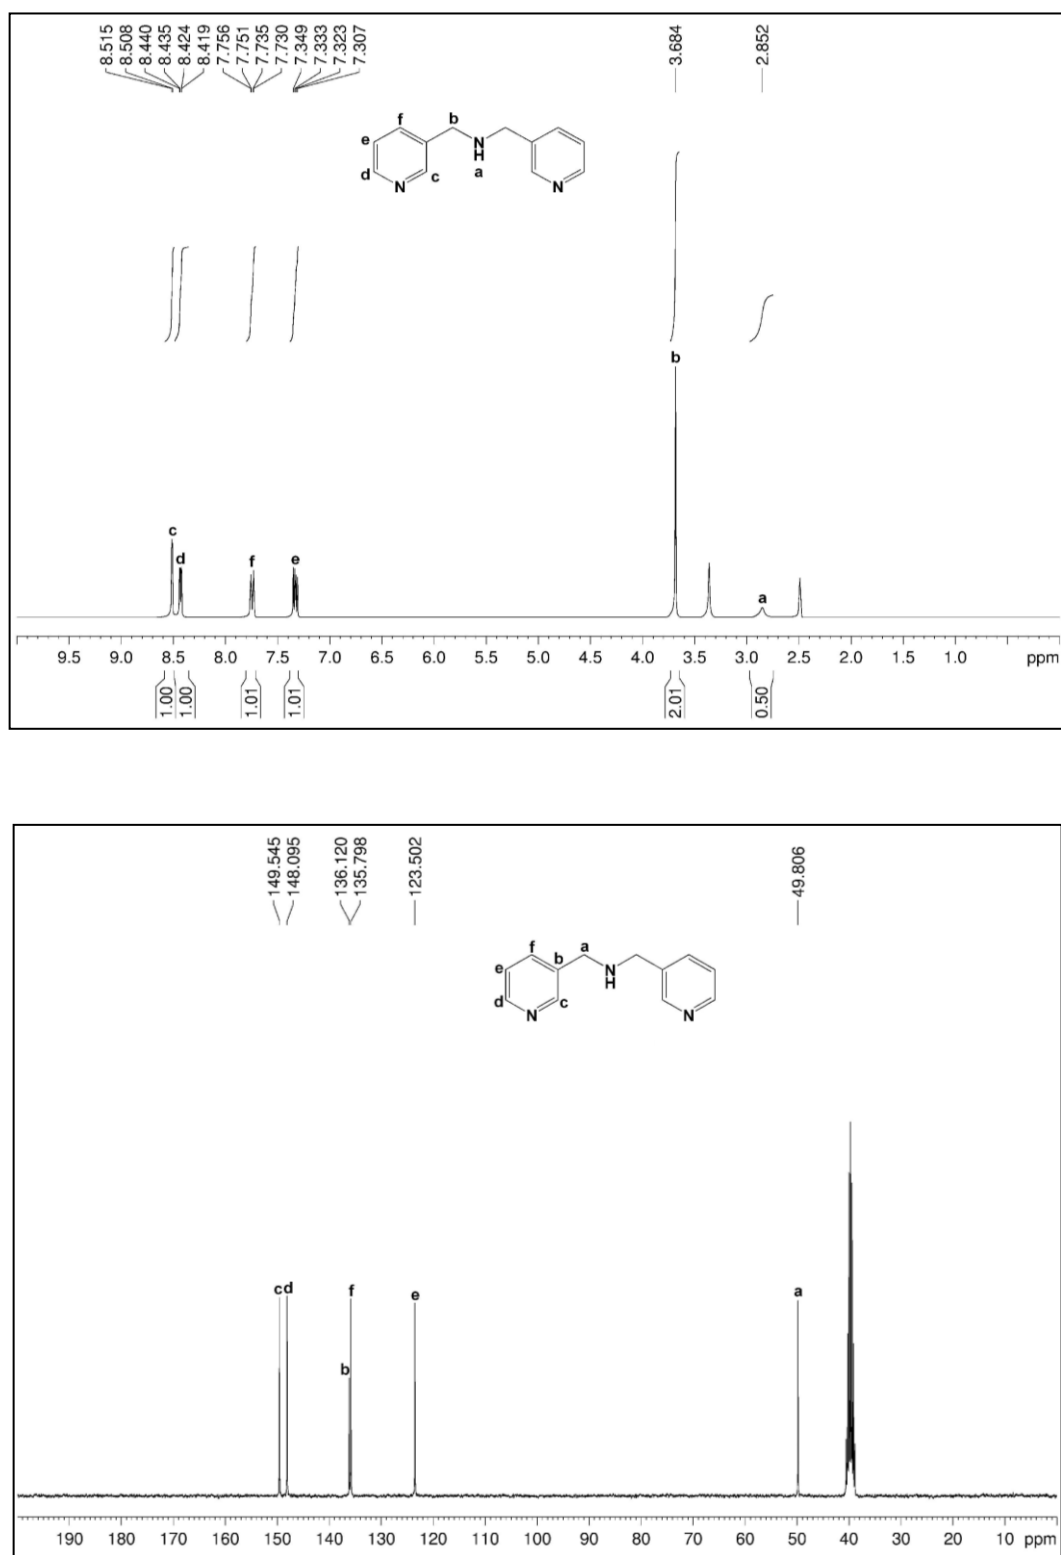

**Fig. S1** <sup>1</sup>H NMR (upper) and <sup>13</sup>C{<sup>1</sup>H} (lower) spectra of dpma in DMSO-*d*<sub>6</sub> at room temperature.

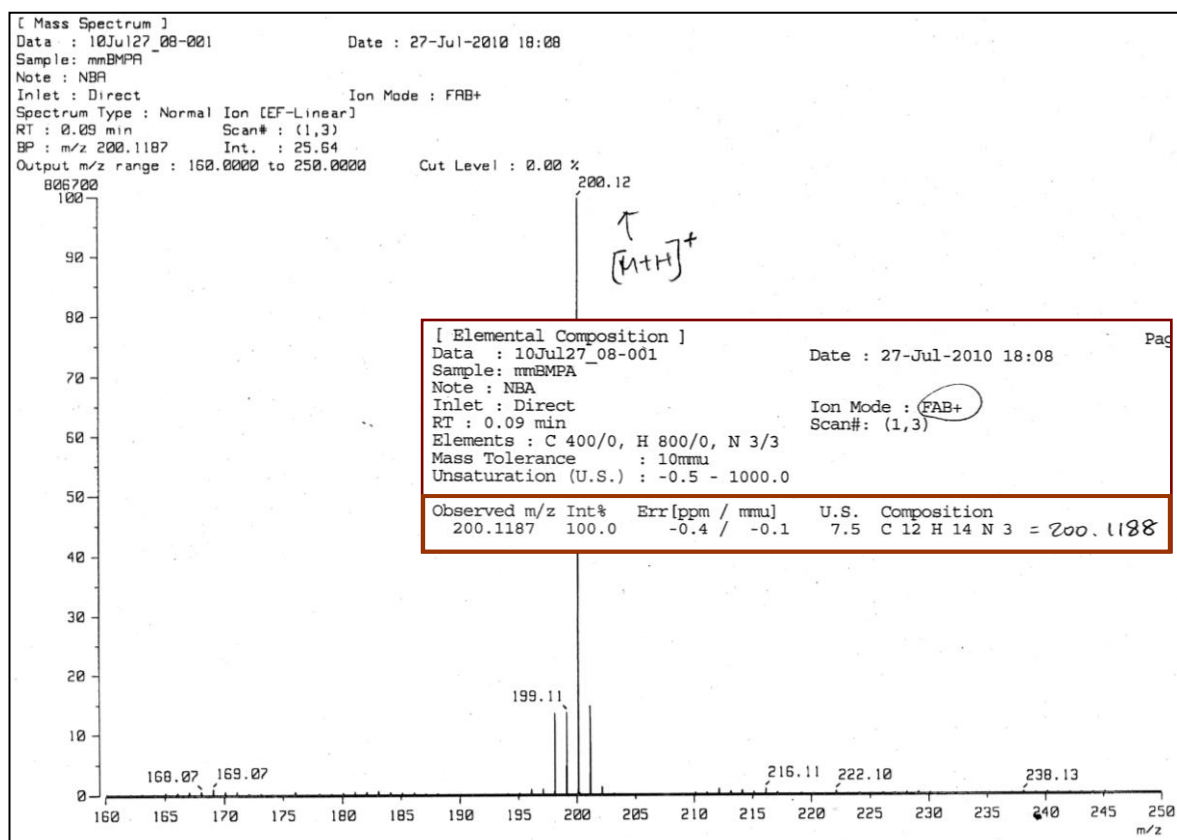

**Fig. S2** Fast atom bombardment (FAB) mass spectrum of dpma. Inserted figure shows the result of high resolution FAB mass data of dpma.

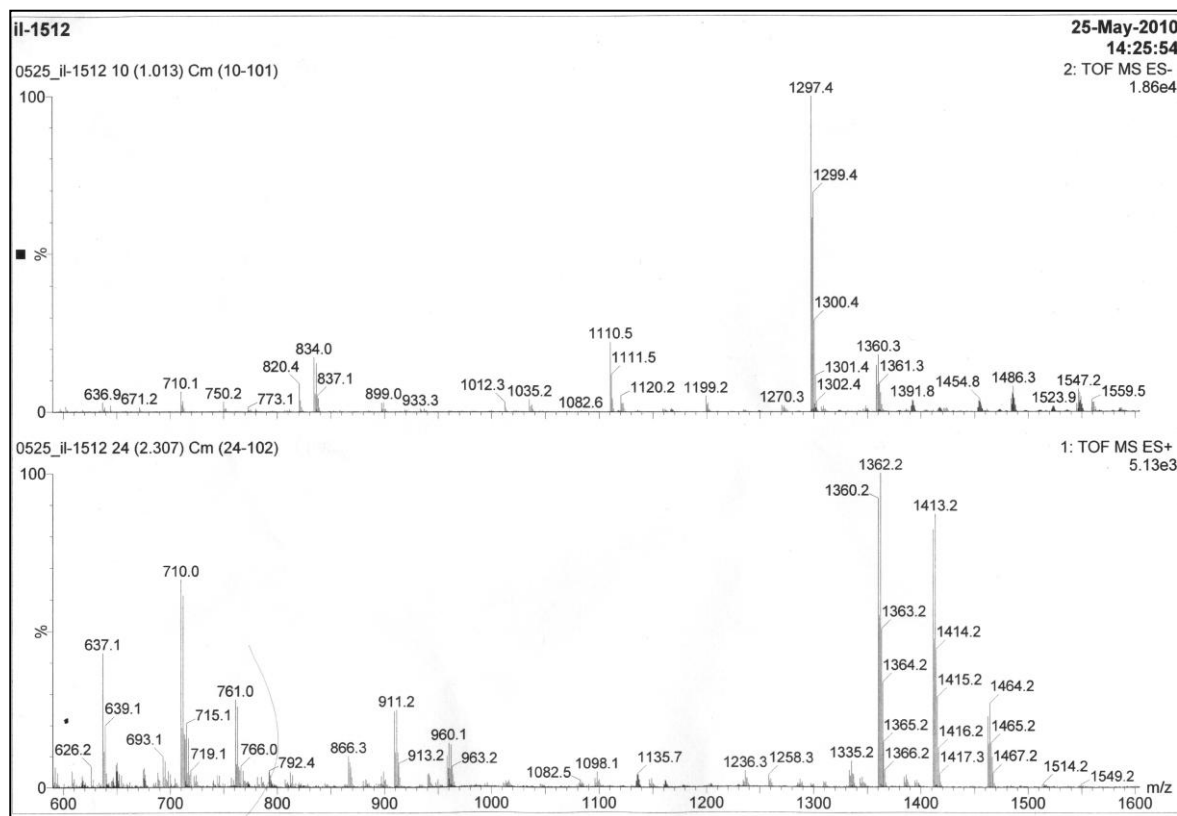

**Fig. S3** Negative (upper) and positive (lower) electrospray ionization mass spectra (ESI-MS) of  $M_2L_4$  metalloprism  $[(NO_3)^- \{ Cu_2(\mu-Hdpma)_4 \} (NO_3)_2] (NO_3)_5$  (**1**).

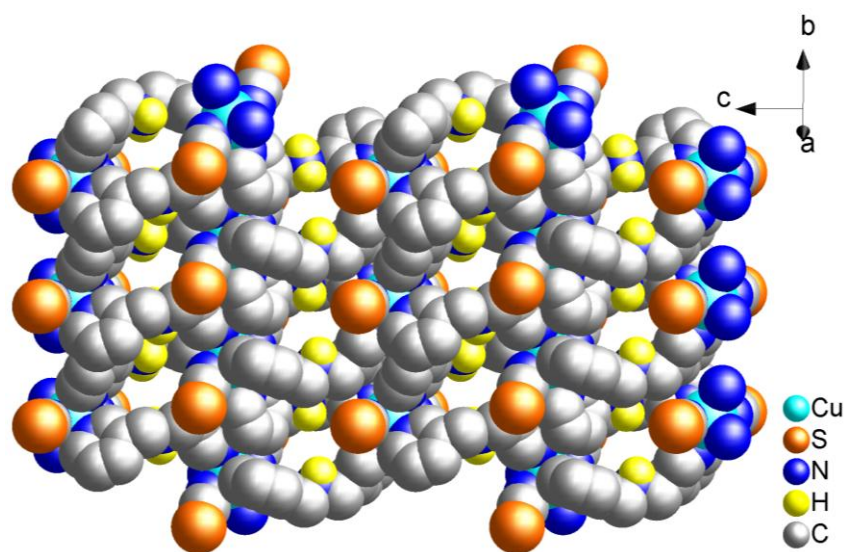

**Fig. S4** Space-filling model representation of the two-dimensional sheet structure of **2**, showing the presence of grooves.

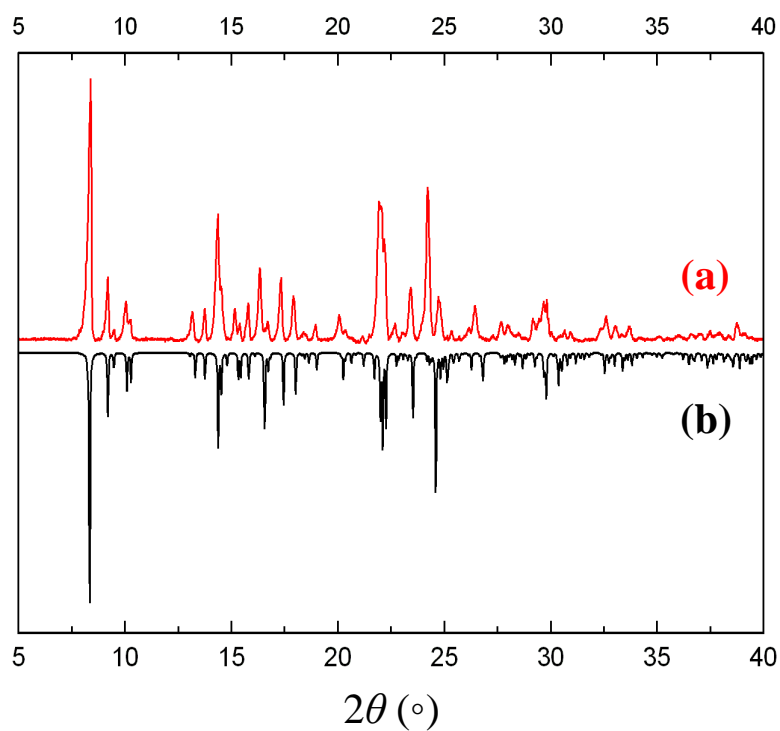

**Fig. S5** Powder X-ray diffraction (PXRD) patterns of **1**. (a) A freshly grounded sample at room temperature. (b) Simulated from the single-crystal data.

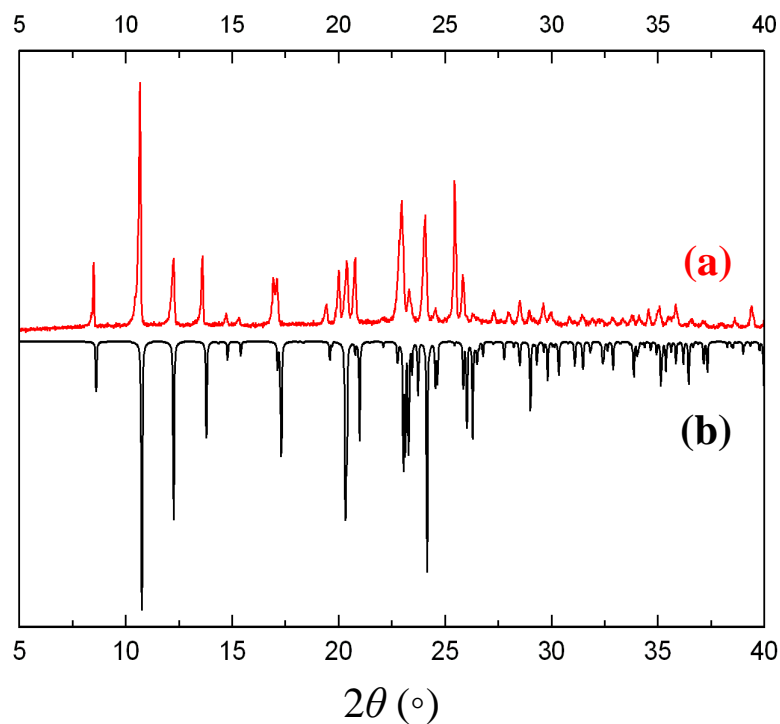

**Fig. S6** Powder X-ray diffraction (PXRD) patterns of **2**. (a) A freshly grounded sample at room temperature. (b) Simulated from the single-crystal data.

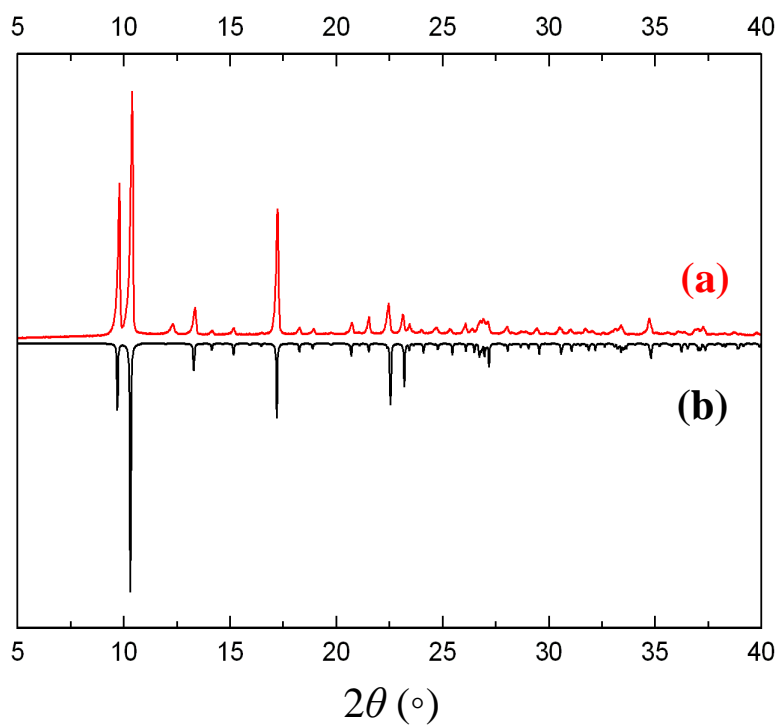

**Fig. S7** Powder X-ray diffraction (PXRD) patterns of **3**. (a) A freshly grounded sample at room temperature. (b) Simulated from the single-crystal data.
